# Supplementary material for: Infant Low Birth Weight Prediction Using Graph Embedding Features
Source: MDPI journal article supplement (doi:10.3390/ijerph20021317), 2023-01-11
Supplement: s1 [file s1]

# Infant Low Birth Weight Prediction using Graph Embedding Features

Supplementary Table S.1: Descriptive statistics of the risk factors.

| Risk Factors                         |                           |
|--------------------------------------|---------------------------|
|                                      | Mean (standard deviation) |
| Maternal age (years)                 | 31.6 (6.07)               |
| BMI at delivery (kg/m <sup>2</sup> ) | 31.6 (5.96)               |
| First trimester weight (kg)          | 71.0 (15.66)              |
| Second trimester weight (kg)         | 74.3 (15.46)              |
| Third trimester weight (kg)          | 79.4 (14.83)              |
| Height (cm)                          | 158.5 (5.37)              |
| Interpregnancy interval (days)       | 1014 (782)                |
|                                      | Range                     |
| Gravida                              | 1-20                      |
| Parity                               | 0-16                      |
| Previous caesarian delivery          | 0-10                      |
| Previous pregnancy loss              | 0-11                      |
|                                      |                           |
|                                      | Number (%)                |
| Baby gender                          |                           |
| Male                                 | 1,878 (53.6)              |
| Female                               | 1,629 (46.4)              |
| Planned pregnancy                    |                           |
| No                                   | 1,514 (46.3)              |
| Yes                                  | 1,753 (53.7)              |
| Infertility treatment                |                           |
| No                                   | 2,914 (90.3)              |
| Yes                                  | 314 (9.7)                 |
| Consanguinity                        |                           |
| No                                   | 1,009 (54.7)              |
| Yes                                  | 836 (45.3)                |
| Education                            |                           |
| No                                   | 2,205 (68.4)              |
| Yes                                  | 1,021 (31.6)              |
| Employment                           |                           |
| No                                   | 1,647 (51.0)              |
| Yes                                  | 1,580 (49.0)              |
| Passive smoking                      |                           |
| No                                   | 2,162 (66.0)              |
| Yes                                  | 1,114 (34.0)              |
| Physical exercise before pregnancy   |                           |
| Never                                | 1,683 (55.8)              |
| 1-2 times a week                     | 582 (19.3)                |
| 3-5 times a week                     | 479 (15.9)                |

|                                    |              |
|------------------------------------|--------------|
| Daily                              | 273 (9.0)    |
| Physical exercise during pregnancy |              |
| Never                              | 1,654 (54.0) |
| 1-2 times a week                   | 722 (23.6)   |
| 3-5 times a week                   | 268 (8.7)    |
| Daily                              | 419 (13.7)   |
| House type                         |              |
| Rent                               | 632 (19.9)   |
| Owned                              | 2,545 (80.1) |
| Worry about upcoming childbirth    |              |
| No                                 | 1,024 (32.1) |
| Yes                                | 2,164 (67.9) |
| Previous LBW                       |              |
| No                                 | 1,479 (42.1) |
| Yes                                | 2,030 (57.9) |
| Previous preterm birth             |              |
| No                                 | 3,115 (88.8) |
| Yes                                | 394 (11.2)   |
| Blood group/type                   |              |
| A                                  | 1,048 (29.9) |
| B                                  | 520 (14.8)   |
| AB                                 | 138 (3.9)    |
| O                                  | 1,803 (51.4) |
| Preexisting hypertension           |              |
| No                                 | 3,440 (98.0) |
| Yes                                | 69 (2.0)     |
| Preexisting diabetes mellitus      |              |
| No                                 | 3,370 (96.0) |
| Yes                                | 139 (4.0)    |
| Preeclampsia                       |              |
| No                                 | 3,366 (95.9) |
| Yes                                | 143 (4.1)    |
| Growth retardation                 |              |
| No                                 | 3,476 (99.1) |
| Yes                                | 33 (0.9)     |
| Antepartum haemorrhage             |              |
| No                                 | 3,498 (99.7) |
| Yes                                | 11 (0.3)     |
| Polyhydramnios                     |              |
| No                                 | 3,427 (97.7) |
| Yes                                | 82 (2.3)     |
| Oligohydramnios                    |              |
| No                                 | 3,433 (97.8) |
| Yes                                | 76 (2.2)     |
| Infection of amniotic sac          |              |
| No                                 | 3,423 (97.6) |
| Yes                                | 86 (2.4)     |
| Premature rupture of membrane      |              |

|                         |              |
|-------------------------|--------------|
| No                      | 2,931 (83.5) |
| Yes                     | 578 (16.5)   |
| Placental disorders     |              |
| No                      | 3,477 (99.1) |
| Yes                     | 32 (0.9)     |
| Placenta previa         |              |
| No                      | 3,461 (98.6) |
| Yes                     | 48 (1.4)     |
| Abruptio placentae      |              |
| No                      | 3,438 (98.0) |
| Yes                     | 71 (2.0)     |
| Streptococcus B carrier |              |
| No                      | 2,620 (74.7) |
| Yes                     | 889 (25.3)   |
| Genitourinary infection |              |
| No                      | 3,471 (98.9) |
| Yes                     | 38 (1.1)     |
| Bariatric surgery       |              |
| No                      | 3,348 (95.4) |
| Yes                     | 161 (4.6)    |
